# Supplementary material for: Plasma-engineered bifunctional cobalt–metal organic framework derivatives for high-performance complete water electrolysis
Source: Royal Society of Chemistry journal article supplement (doi:10.1039/d1nr00317h), 2021-01-01
Supplement: d1nr00317h1.pdf [file d1nr00317h1.pdf]

## **Plasma-engineered bifunctional Cobalt-metal organic framework derivatives for high-performance complete water electrolysis**

*Wenxia Chen<sup>a\*</sup>, Wei Wei<sup>a</sup>, Kefeng Wang<sup>a</sup>, Nan Zhang<sup>a</sup>, Guangliang Chen<sup>b</sup>, Yingjie Hu<sup>c\*</sup> and Kostya (Ken) Ostrikov<sup>d</sup>*

<sup>a</sup>School of Chemistry and Chemical Engineering, Henan Key Laboratory of Biomolecular Recognition and Sensing, Henan D&A Engineering Center of Advanced Battery Materials, Shangqiu Normal University, Shangqiu 476000, China.

<sup>b</sup>Key Laboratory of Advanced Textile Materials and Manufacturing Technology and Engineering Research Center for Eco-Dyeing & Finishing of Textiles, Ministry of Education, Zhejiang Sci-Tech University, Hangzhou 310018, P. R. China.

<sup>c</sup>Key Laboratory of Advanced Functional Materials of Nanjing, Nanjing Xiaozhuang University, Nanjing 211171, China.

<sup>d</sup>School of Chemistry and Physics and Centre for Materials Science, Queensland University of Technology, Brisbane, QLD 4000, Australia.

\*Corresponding authors E-mail: [wxchenedu@163.com](mailto:wxchenedu@163.com), [huyj113@qq.com](mailto:huyj113@qq.com).

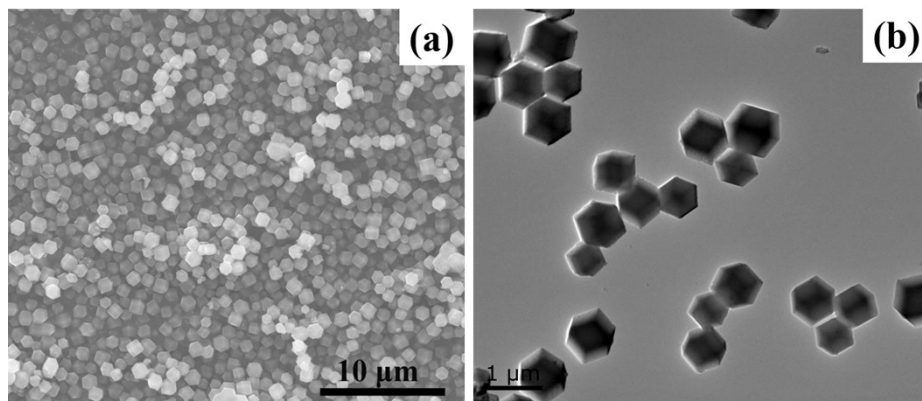

**Fig. S1** (a) SEM images of the ZIF-67 and corresponding (b) TEM images.

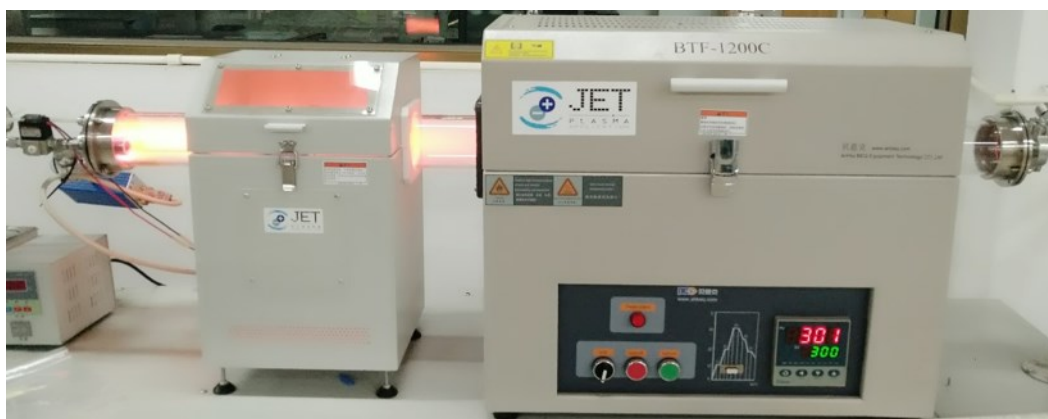

**Fig. S2** 3D ZIF-67 polyhedron is disposed via P dopants and pyrolysis procedures simultaneously under Ar-N<sub>2</sub> RF plasma discharge process.

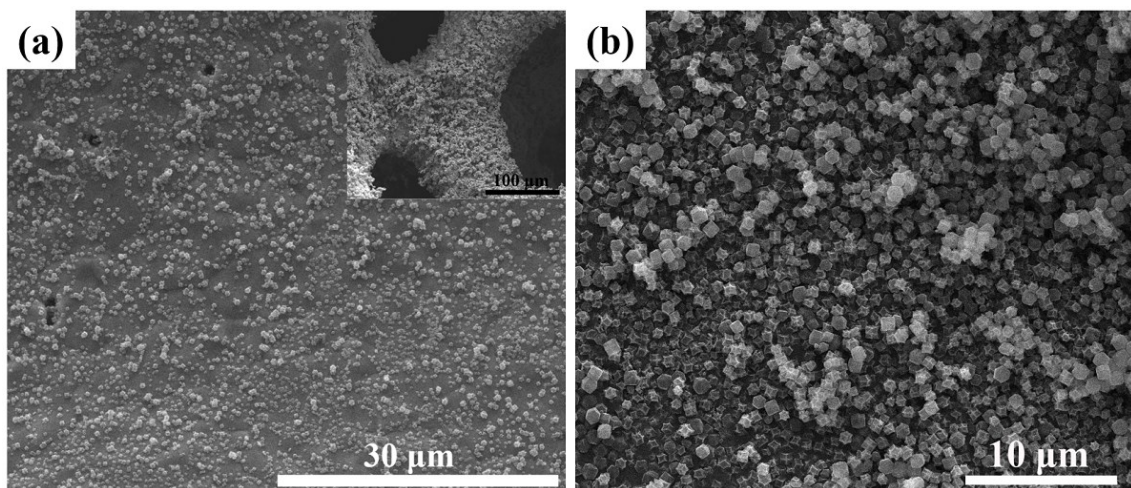

**Fig. S3** The SEM images of the MOFs-derived CoPO on NF.

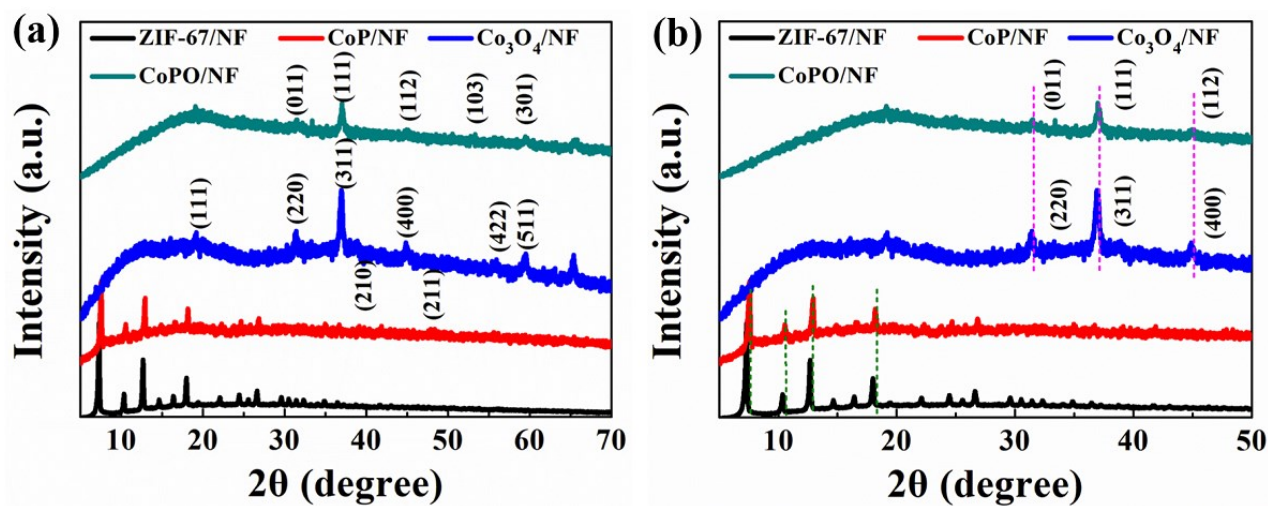

Fig. S4 (a) The XRD patterns of these samples and (b) the enlarged view.

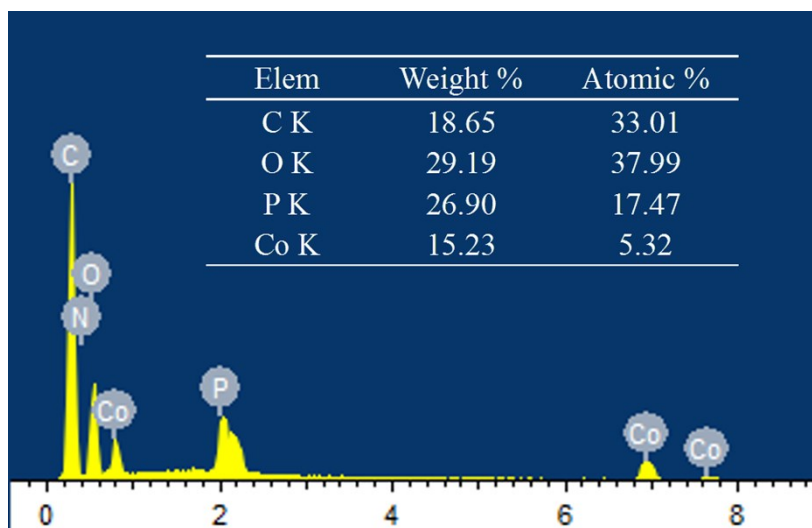

**Fig. S5** The EDX analysis of the CoPO/NF.

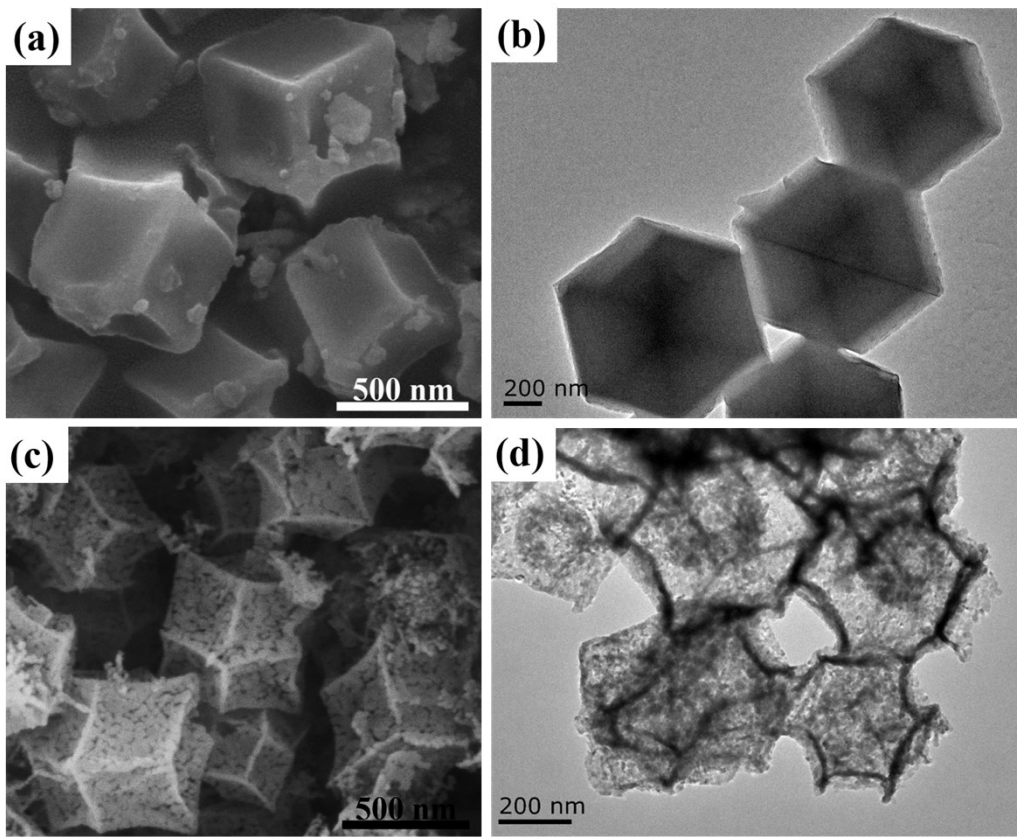

**Fig. S6** SEM and TEM images of the CoP and Co<sub>3</sub>O<sub>4</sub>.

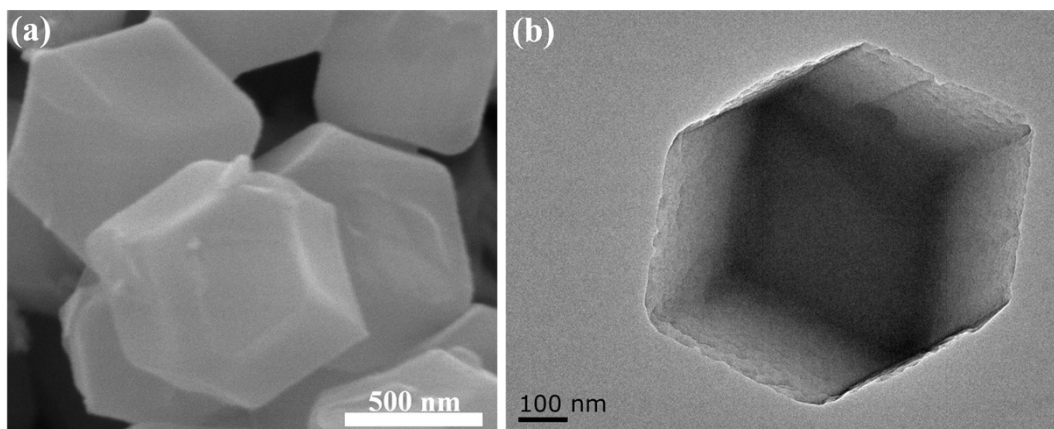

**Fig. S7** (a) SEM and (b) TEM images of ZIF-67 treated by Ar-N<sub>2</sub> RF plasma.



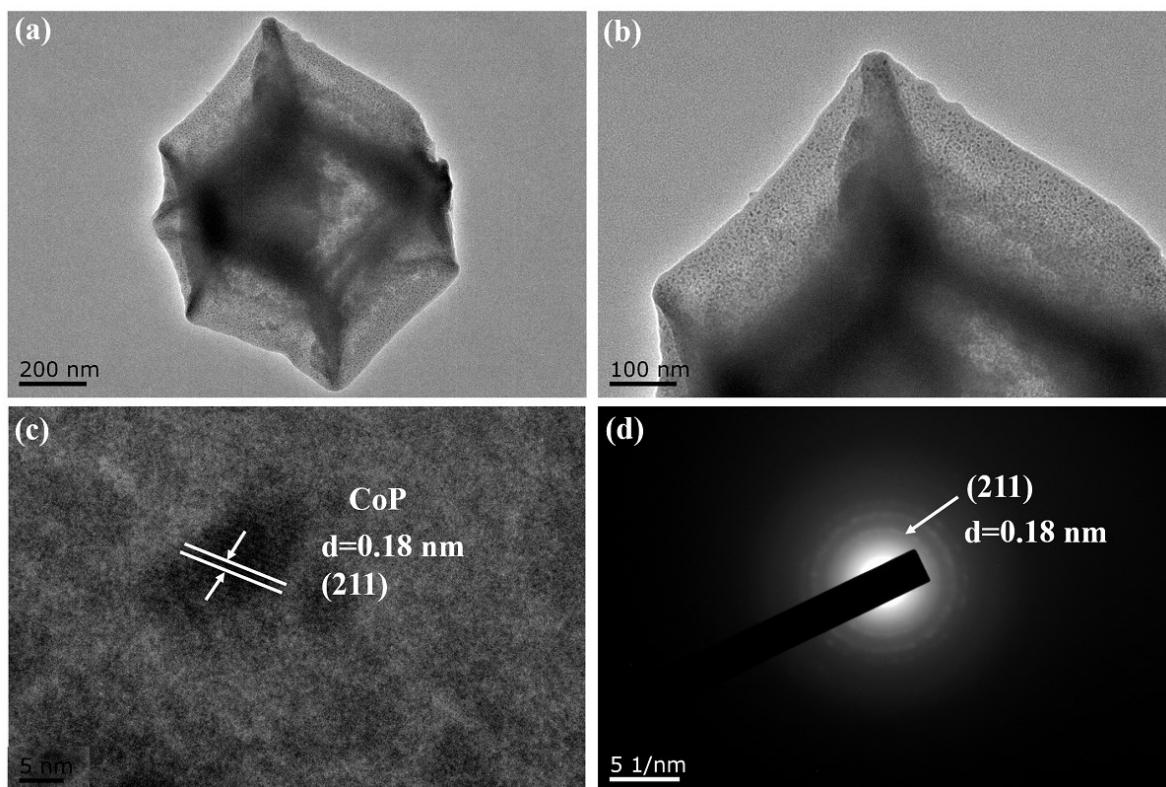

**Fig. S8** (a) and (b) TEM, (c) HRTEM, and (d) the corresponding SAED pattern of the CoP samples.

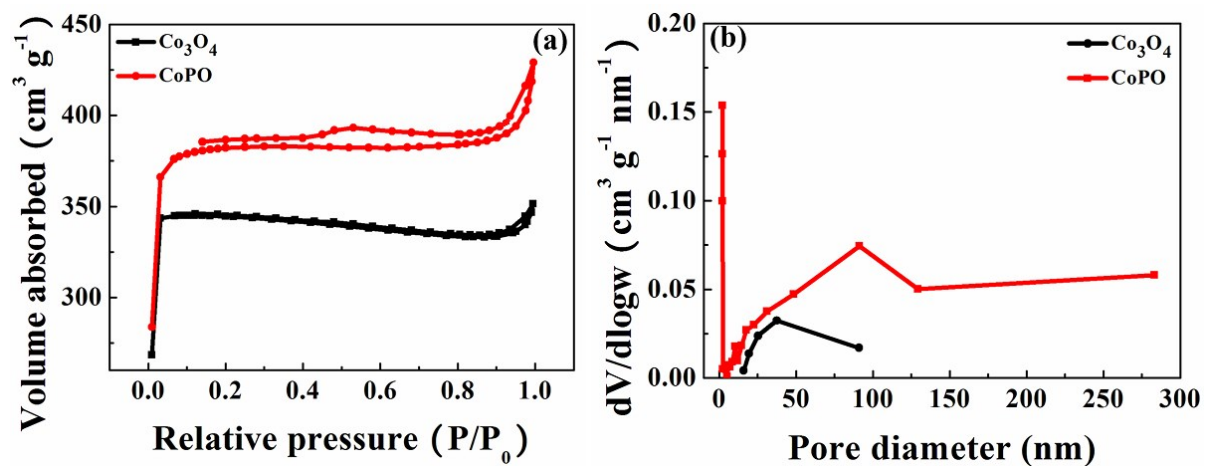

**Fig. S9** The  $\text{N}_2$  adsorption-desorption isotherm and pore size distribution of the  $\text{CoPO}$  and ZIF-67.

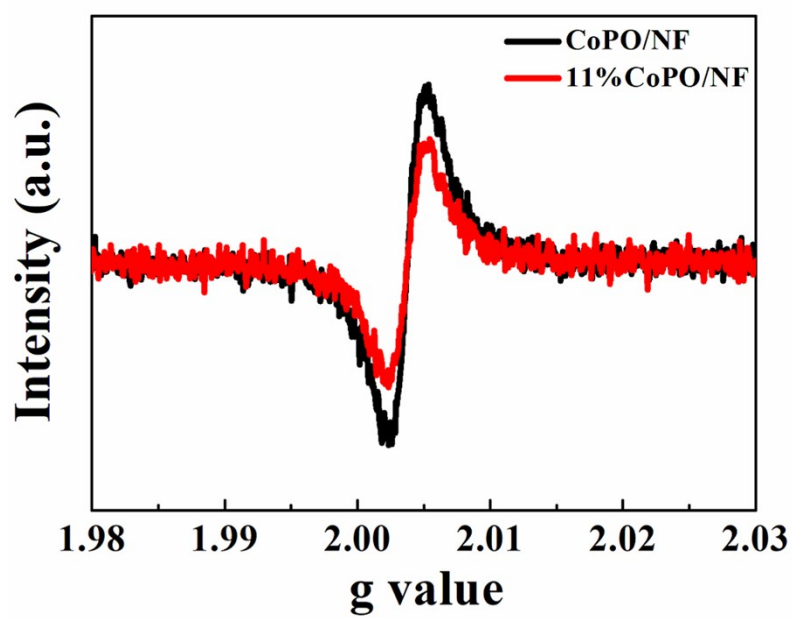

**Fig. S10** The EPR analysis of the prepared samples.

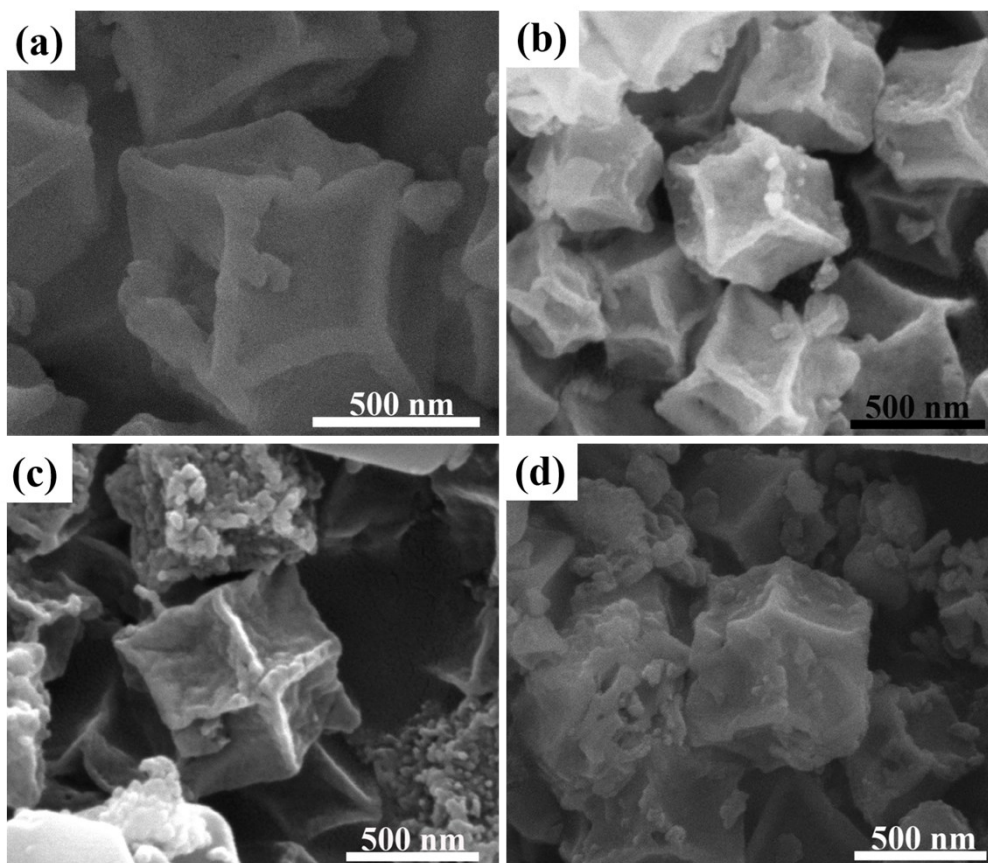

**Fig. S11** SEM images of CoPO with different amounts of P.

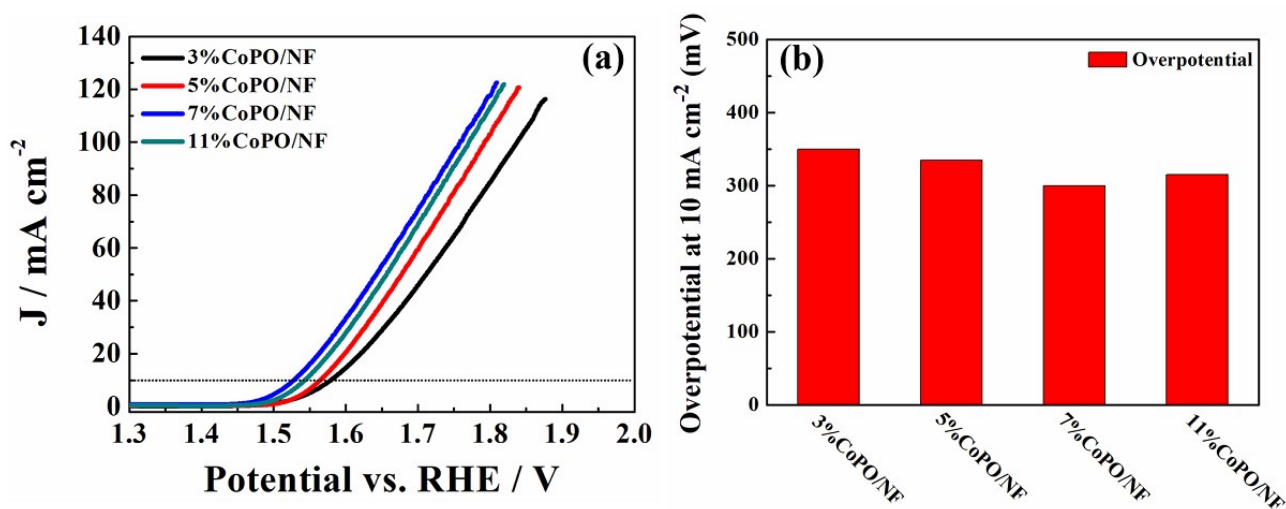

**Fig. S12** LSV curves of (a) 3%CoPO/NF, 5%CoPO/NF, 7%CoPO/NF, 11%CoPO/NF for the OER, and (d) the corresponding overpotential at 10 mA cm<sup>-2</sup>.

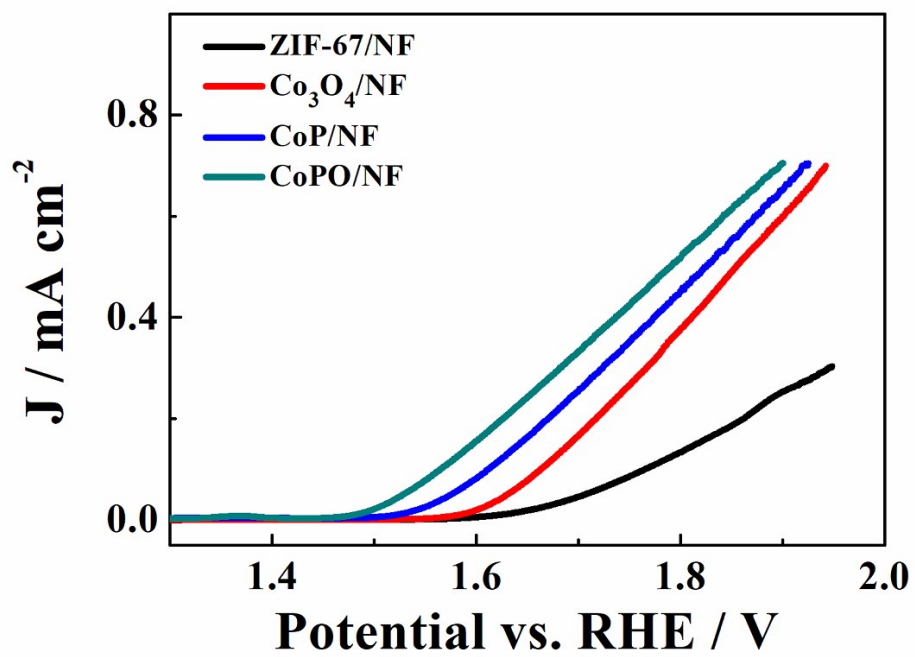

**Fig. S13** The LSV curves normalized by ECSA for the prepared samples.

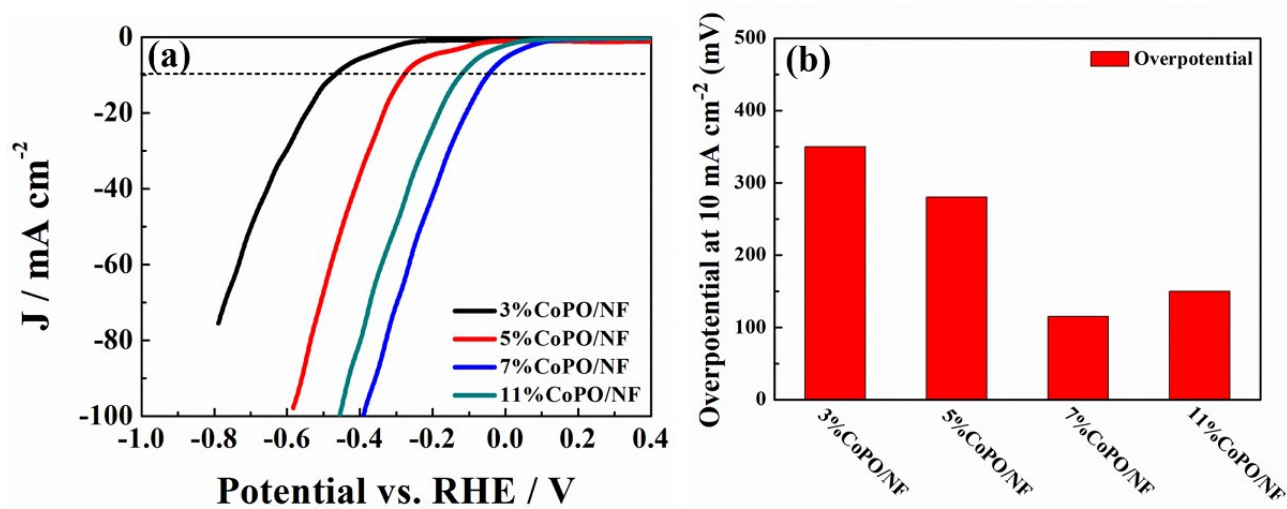

**Fig. S14** LSV curves of (a) 3%CoPO/NF, 5%CoPO/NF, 7%CoPO/NF, 11%CoPO/NF for the HER, and (d) the corresponding overpotential at  $10 \text{ mA cm}^{-2}$ .

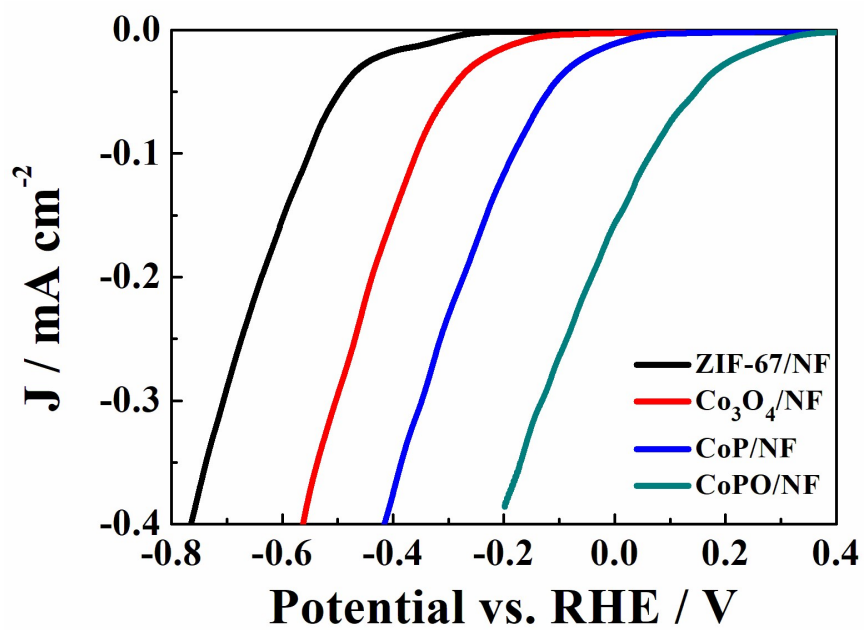

Fig. S15 The LSV curves normalized by ECSA for the prepared samples.



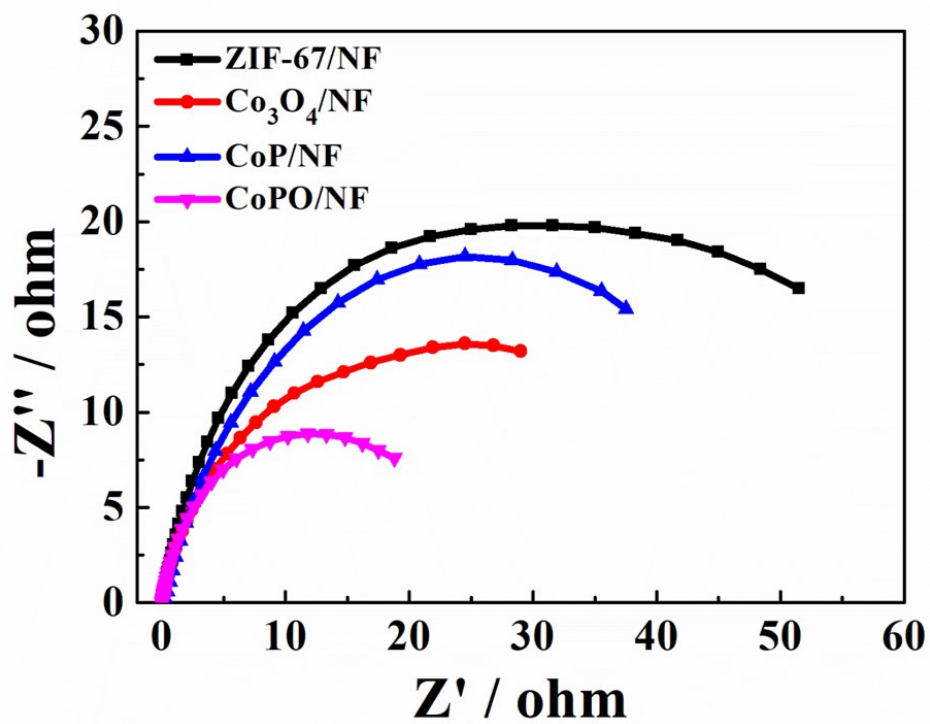

Fig. S16 The electrochemical impedance spectroscopy (EIS) spectra.

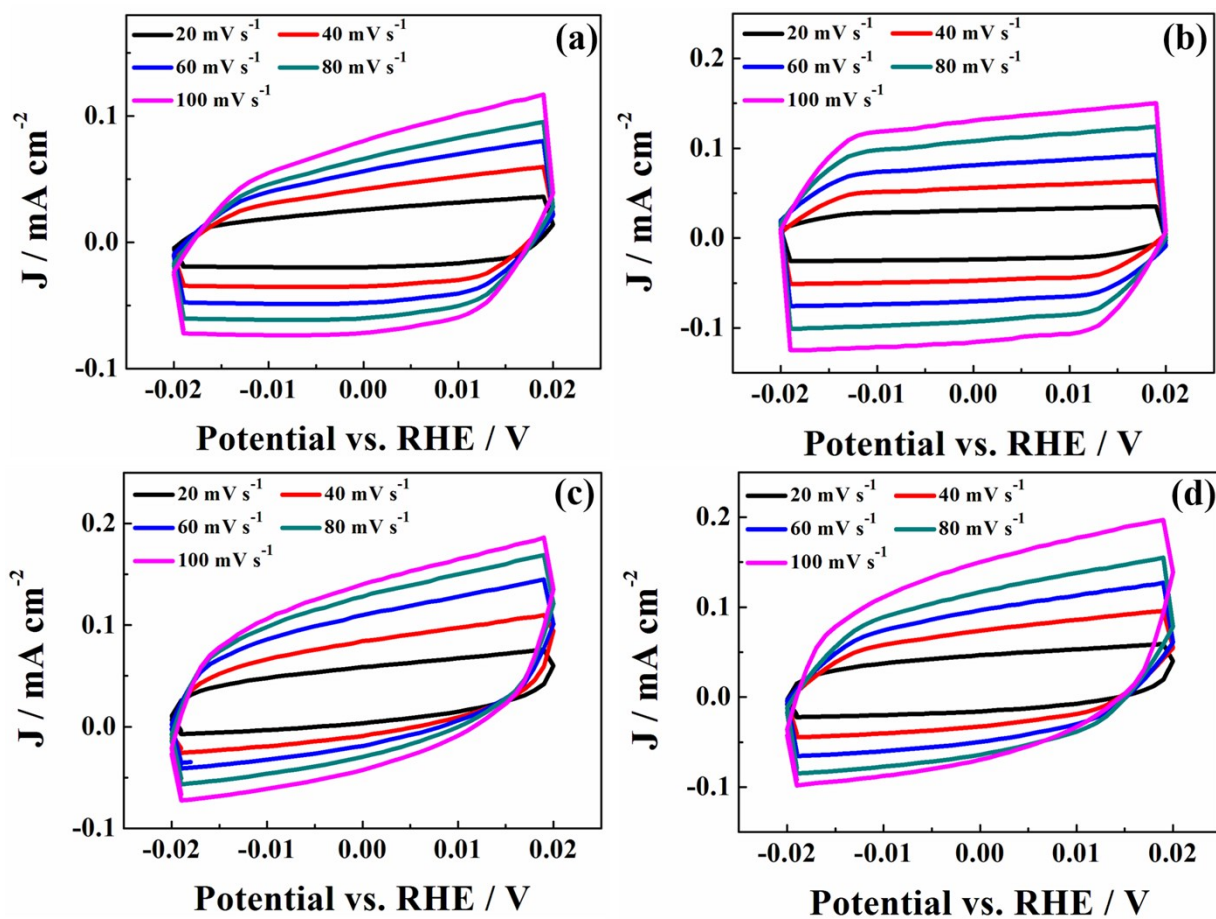

**Fig. S17** CV curves at various scan rates in the potential range -0.02~0.02 V vs. RHE for (a) ZIF-67/NF, (b)  $\text{Co}_3\text{O}_4$ /NF, (c) CoP/NF and (d) CoPO/NF, respectively.

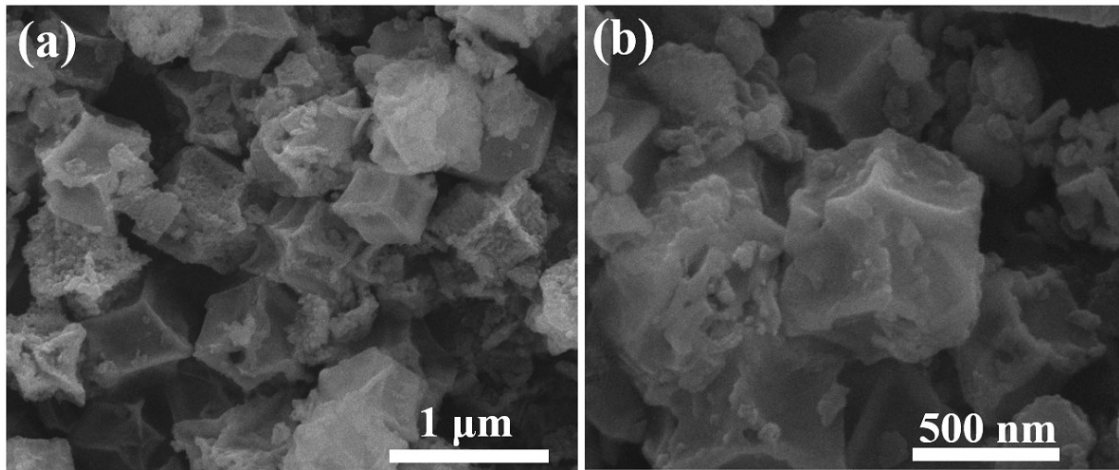

**Fig. S18** The SEM image of the CoPO/NF after the OER and HER tests.

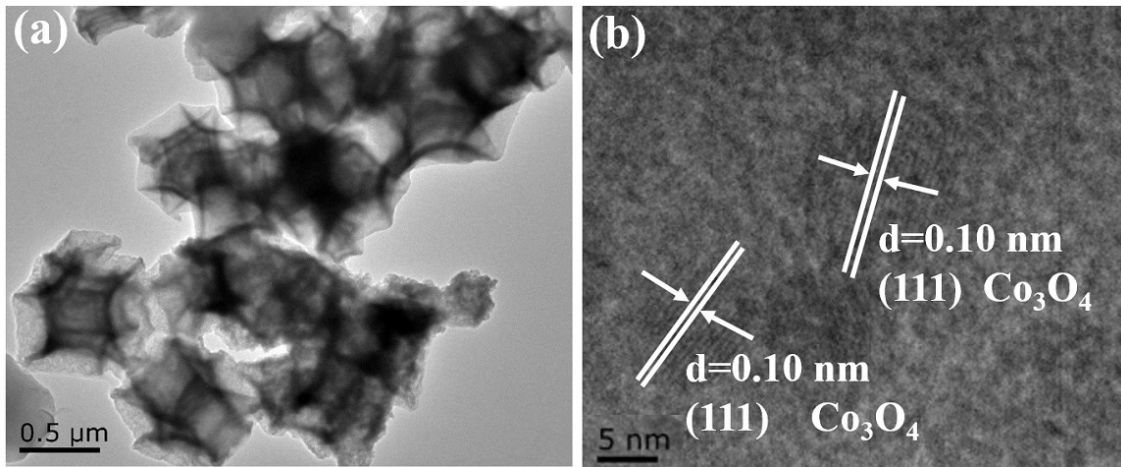

**Fig. S19** The TEM image of the CoPO/NF after the OER and HER tests.

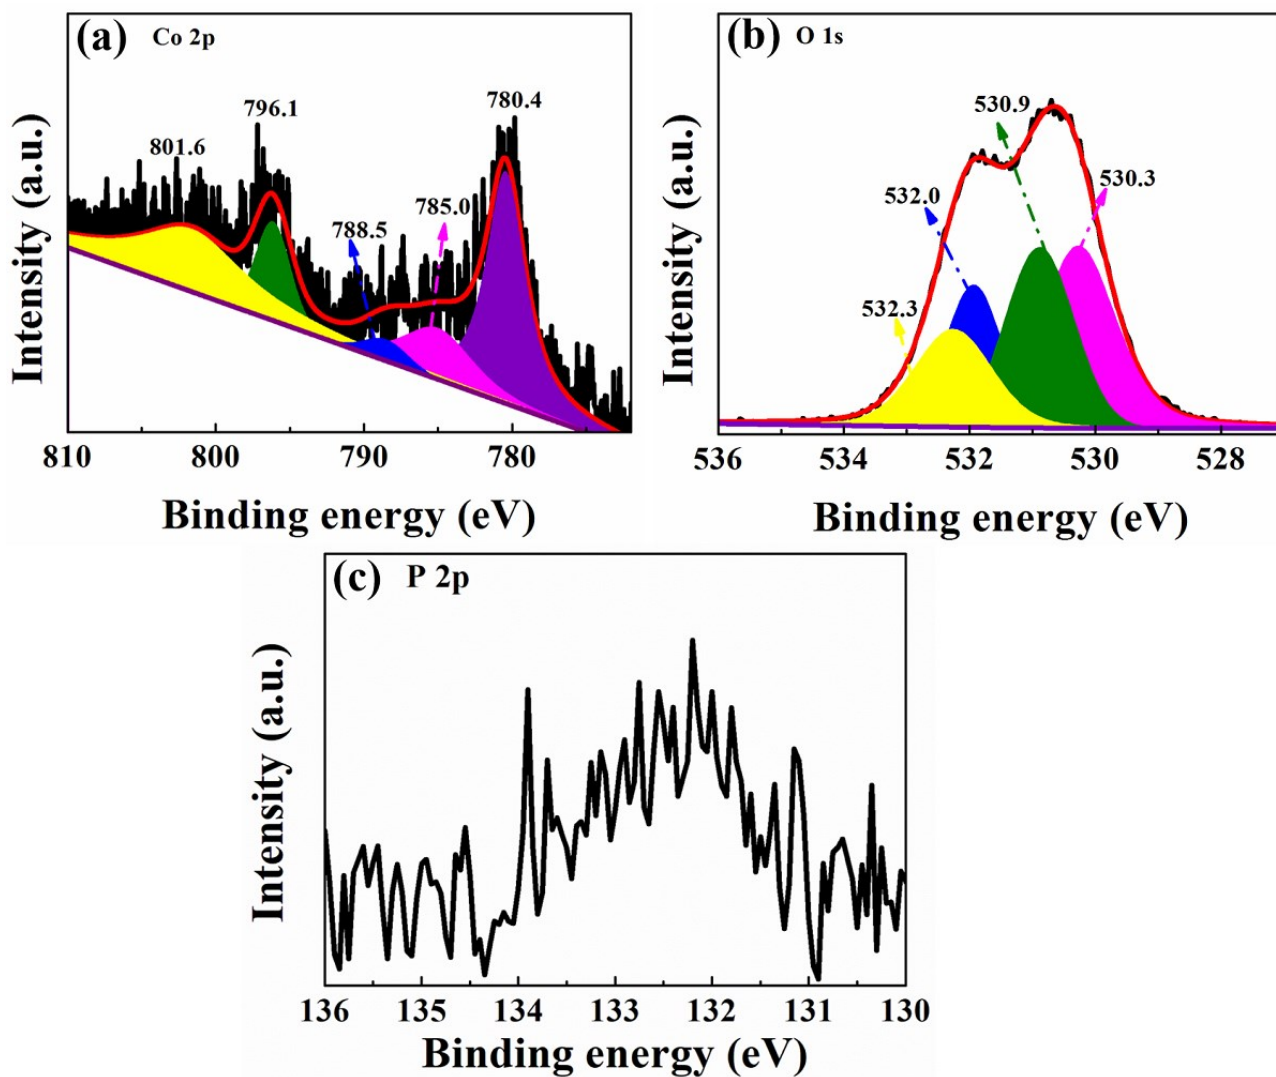

**Fig. S20** XPS spectra of (a) Co 2p, (b) O 1s and (c) P 2p after electrochemistry test.

**Table S1.** The comparison of OER performance with state-of-the-art electrocatalysts.

| <b>Materials</b>                          | <b>Supports</b> | <b>Electrolytes</b> | <b><math>\eta_{J=10 \text{ mA cm}^{-2}}</math> (mV)</b> | <b>References</b> |
|-------------------------------------------|-----------------|---------------------|---------------------------------------------------------|-------------------|
| CoPO/NF                                   | Ni foam         | 1 M KOH             | 275                                                     | This work         |
| CoP/NCNHP                                 | -               | 1 M KOH             | 310                                                     | 1                 |
| CoP-2                                     | -               | 1 M KOH             | 310                                                     | 2                 |
| Co 2 P NCs                                | -               | 1 M KOH             | 280                                                     | 3                 |
| Co-P film                                 | -               | 1 M KOH             | 345                                                     | 4                 |
| Co/CoP                                    | -               | 1 M KOH             | 340                                                     | 5                 |
| NiFe/NiCo <sub>2</sub> O <sub>4</sub> /NF | Ni Foam         | 1M KOH              | 340                                                     | 6                 |
| NiCoP/C                                   | -               | 1M KOH              | 330                                                     | 7                 |

**Table S2** TOF of the as-prepared catalysts at overpotential of 200, 250 and 300 mV corresponding to OER.

| <b>Samples</b><br><b>TOF s<sup>-1</sup>(mV)</b> | <b>ZIF-67/NF</b>       | <b>Co<sub>3</sub>O<sub>4</sub>/NF</b> | <b>CoP/NF</b>          | <b>CoPO/NF</b>         |
|-------------------------------------------------|------------------------|---------------------------------------|------------------------|------------------------|
| <b>η=200</b>                                    | 7.410×10 <sup>-7</sup> | 1.523×10 <sup>-6</sup>                | 4.244×10 <sup>-6</sup> | 4.954×10 <sup>-6</sup> |
| <b>250</b>                                      | 8.809×10 <sup>-7</sup> | 1.860×10 <sup>-6</sup>                | 4.617×10 <sup>-6</sup> | 1.467×10 <sup>-5</sup> |
| <b>300</b>                                      | 1.471×10 <sup>-7</sup> | 2.539×10 <sup>-6</sup>                | 1.581×10 <sup>-5</sup> | 7.721×10 <sup>-5</sup> |

**Table S3.** The comparison of HER performance with state-of-the-art electrocatalysts.

| <b>Materials</b>                      | <b>Supports</b> | <b>Electrolytes</b> | <b><math>\eta_{J=10 \text{ mA cm}^{-2}}</math> (mV)</b> | <b>References</b> |
|---------------------------------------|-----------------|---------------------|---------------------------------------------------------|-------------------|
| CoPO/NF                               | Ni foam         | 1 M KOH             | 156                                                     | This work         |
| Co1Mn1CH                              | -               | 1 M KOH             | 180                                                     | 8                 |
| Co-NC/CNT                             | NF              | 1 M KOH             | 203                                                     | 9                 |
| Co-Zn/PNC                             | NF              | 1 M KOH             | 180                                                     | 10                |
| Co/ $\beta$ -Mo <sub>2</sub> C@N-CNTs | -               | 1 M KOH             | 170                                                     | 11                |
| Co(OH) <sub>2</sub> @NCNT             | NF              | 1 M KOH             | 170                                                     | 12                |
| O-Co <sub>2</sub> P-3                 | -               | 1M KOH              | 160                                                     | 13                |
| CoP@C-NPs/GA-5                        |                 | 1M KOH              | 225                                                     | 14                |
| Co/CoP                                | -               | 1M KOH              | 253                                                     | 15                |
| CoPS@NPS-C                            | -               | 1M KOH              | 191                                                     | 16                |



**Table S4.** TOF of the as-prepared catalysts at overpotential of 200, 250 and 300 mV corresponding to HER.

| <b>Samples</b><br><b>TOF s<sup>-1</sup>(mV)</b> | <b>ZIF-67/NF</b>       | <b>Co<sub>3</sub>O<sub>4</sub>/NF</b> | <b>CoP/NF</b>          | <b>CoPO/NF</b>         |
|-------------------------------------------------|------------------------|---------------------------------------|------------------------|------------------------|
| <b>η=200</b>                                    | 6.950×10 <sup>-7</sup> | 1.498×10 <sup>-6</sup>                | 3.991×10 <sup>-6</sup> | 3.995×10 <sup>-6</sup> |
| <b>250</b>                                      | 7.998×10 <sup>-7</sup> | 1.796×10 <sup>-6</sup>                | 3.895×10 <sup>-6</sup> | 1.051×10 <sup>-5</sup> |
| <b>300</b>                                      | 1.501×10 <sup>-7</sup> | 2.241×10 <sup>-6</sup>                | 1.052×10 <sup>-5</sup> | 6.154×10 <sup>-5</sup> |

**Table S5.** Comparison of the full water-splitting performances of CoPO/NF with other state-of-the-art electrocatalysts in 1.0 M KOH.

| <b>Materials</b>                   | <b>Cell voltages (V) at J = 10 mA cm<sup>-2</sup></b> | <b>References</b> |
|------------------------------------|-------------------------------------------------------|-------------------|
| CoPO/NF                            | 1.62                                                  | This work         |
| NiCo <sub>2</sub> O <sub>4</sub>   | 1.65                                                  | 17                |
| Co <sub>1</sub> Mn <sub>1</sub> CH | 1.68                                                  | 8                 |
| Ni-P/CP                            | 1.63                                                  | 18                |
| CoP/NCNHP                          | 1.64                                                  | 1                 |
| NiCo <sub>2</sub> N/NF             | 1.70                                                  | 19                |
| BP/Co <sub>2</sub> P               | 1.92                                                  | 20                |
| (Co-NMC) <sub>1</sub> /NC/GCE      | 1.78                                                  | 21                |

## References:

- 1 Y. Pan, K. A. Sun, S. J. Liu, X. Cao, K. L. Wu, W. C. Cheong, Z. Chen, Y. Wang, Y. Li, Y. Q. Liu, D. S. Wang, Q. Peng, C. Chen, Y. D. Li. *J. Am. Chem. Soc.*, 2018, **140**, 2610-2618.
- 2 G. Y. Zhou, M. Li, Y. L. Li, H. Dong, D. M. Sun, X. E. Liu, L. Xu, Z. Q. Tian, and Y. W. Tang, *Adv. Funct. Mater.*, 2020, **30**, 1905252.
- 3 H. Li, Q. Li, P. Wen, T. B. Williams, S. Adhikari, C. C. Dun, C. Lu, D. Itanze, L. Jiang, D. L. Carroll, G. L. Donati, P. M. Lundin, Y. J. Qiu, and S. M. Geyer. *Adv. Mater.*, 2018, **30**, 1705796.
- 4 N. Jiang, B. You, M. L. Sheng, and Y. J. Sun, *Angew. Chem.*, 2015, **127**, 6349-6352.
- 5 Y. C. Hao, Y. Q. Xu, W. Liu, X. M. Sun, *Mater. Horiz.*, 2018, **5**, 108-115.
- 6 C. Xiao, Y. Li, X. Lu, C. Zhao, *Adv. Funct. Mater.*, 2016, **26**, 3515-3523.
- 7 P. L. He, X. Y. Yu, and X. W. (David) Lou, *Angew. Chem.*, 2017, **129**, 3955-3958.
- 8 T. Tang, W. J. Jiang, S. Niu, N. Liu, H. Luo, Y. Y. Chen, S. F. Jin, F. Gao, L. J. Wan, J. S. Hu, *J. Am. Chem. Soc.*, 2017, **139**, 8320-8328.
- 9 F. Yang, P. Zhao, X. Hua, W. Luo, G. Cheng, W. Xing, S. Chen, *J. Mater. Chem. A*, 2016, **4**, 16057-16063.
- 10 W. Peng, G. Zheng, Y. Wang, S. Cao, Z. Ji, Y. Huan, M. Zou, X. Yan, *Int. J. Hydrogen Energy*, 2019, **44**, 19782-19791.
- 11 Z. Liu, T. Ouyang, Y. Ye, C. Wu, K. Xiao, *Angew. Chem. Int. Ed.*, 2019, **58**, 4923-4928.
- 12 P. Guo, J. Wu, X. B. Li, J. Luo, W. M. Lau, H. Liu, X. L. Sun, L. M. Liu, *Nano Energy*, 2018, **96**, 96-104.
- 13 K. Xu, H. Ding, M. X. Zhang, M. Chen, Z. K. Hao, L. D. Zhang, C. Z. Wu, Y. Xie, *Adv. Mater.*, 2017, **29**, 1606980.

- 14 W. T. Zhao, X. Q. Lu, M. Selvaraj, W. Wei, Z. F. Jiang, N. Ullah, J. Liu and J. M. Xie. *Nanoscale*, 2018, **10**, 9698-9706.
- 15 Y. C. Hao, Y. Q. Xu, W. Liu and X. M. Sun, *Mater. Horiz.*, 2018, **5**, 108-115.
- 16 C. Lin, Z. F. Gao, J. H. Yang, B. Liu, J. Jin, *J. Mater. Chem. A*, 2018, **6**, 6387-6392.
- 17 X. H. Gao, H. X. Zhang, Q. G. Li, X. G. Yu, Z. L. Hong, X. W. Zhang, C. D. Liang, Z. Lin, *Angew. Chem. Int. Ed.*, 2016, **55**, 6290-6294.
- 18 X. G. Wang, W. Li, D. H. Xiong, D. Y. Petrovykh, L. F. Liu, *Adv. Funct. Mater.*, 2016, **26**, 4067-4077.
- 19 Y. Q. Wang, B. H. Zhang, W. Pan, H. Y. Ma, J. T. Zhang, *ChemSusChem*, 2017, **10**, 4170-4177.
- 20 J. H. Wang, D. N. Liu, H. Huang, N. Yang, B. Yu, M. Wen, X. Wang, P. K. Chu, X. F. Yu. *Angew. Chem. Int. Ed.*, 2018, **57**, 2630-2634.
- 21 B. Bayatsarmadi, Y. Zheng, Y. Tang, M. Jaroniec, S.Z. Qiao, *Small*, 2016, **12**, 3703-3711.
